# Supplementary material for: Role of SDF1/CXCR4 Interaction in Experimental Hemiplegic Models with Neural Cell Transplantation
Source: Int J Mol Sci. 2012 Feb 28;13(3):2636–49. doi: 10.3390/ijms13032636 (PMC3317678; doi:10.3390/ijms13032636)

**Table 1 Expression of chemokine molecules in human brain cells**

---

| Chemokine            | Receptor | Distribution                       |
|----------------------|----------|------------------------------------|
| <b>Physiological</b> |          |                                    |
| <i>In vivo</i>       |          |                                    |
| MCP-1/CCL2           | CCR2     | Fetal and adult brain: neurons[56] |
| SDF-1/CXCL12         | CXCR4    | Adult brain: neurons[57]           |
| Fractalkine/CX3CL1   | CX3CR1   | Adult brain: astrocytes[58]        |
| <i>In vitro</i>      |          |                                    |
| MCP-1/CCL2           | CCR2     | Primary astrocyte culture[59]      |

|                      |        |                                           |
|----------------------|--------|-------------------------------------------|
| MIP-1 $\alpha$ /CCL3 | CCR3   | Primary astrocyte culture[59]             |
| MIP-1 $\beta$ /CCL4  | CCR5   | Primary astrocyte culture[59]             |
| RANTES/CCL5          | CCR5   | Primary astrocyte culture[59]             |
| IL-8/CXCL8           | CXCR2  | Primary astrocyte culture[59]             |
| SDF-1/CXCL12         | CXCR4  | Primary fetal neural cell culture[57]     |
| Fractalkine/CX3CL1   | CX3CR1 | Primary neural and glial cell culture[60] |

### **Pathological**

|                    |        |                                             |
|--------------------|--------|---------------------------------------------|
| IP-10/CXCL10       | CXCR3  | Neurons in HIV encephalitis[61]             |
| SDF-1/CXCL12       | CXCR4  | Neurons and astrocytes in AIDS dementia[57] |
| Fractalkine/CX3CL1 | CX3CR1 | Astrocytes in multiple sclerosis[58]        |
|                    |        | Neurons in HIV encephalitis[62]             |

---

**Table 2: Chemokine expression in brain development**

---

| Chemokine                 | Receptor | Target cells                                                                                                   |
|---------------------------|----------|----------------------------------------------------------------------------------------------------------------|
| <b>Cell migration</b>     |          |                                                                                                                |
| RANTES/CCL5               | CCR5     | neurons[63]                                                                                                    |
| SDF-1/CXCL12              | CXCR4    | cerebellar granule neurons[64]<br><br>cortical neural progenitor[65]<br><br>dentate gyrus granular neurons[66] |
| <b>Cell proliferation</b> |          |                                                                                                                |
| Gro- $\alpha$ /CXCL1      | CXCR2    | astrocytes, oligodendrocyte precursor[67]                                                                      |

|                      |       |                   |
|----------------------|-------|-------------------|
| MCP-1/CCL2           | CCR2  | astrocytes[68]    |
| MIP-1 $\alpha$ /CCL3 | CCR3  | astrocytes[68]    |
| RANTES/CCL5          | CCR5  | astrocytes[59]    |
| SDF-1/CXCL12         | CXCR4 | astrocytes[33,69] |

---

**Figure 1. Schematic representation of neural cell migration in mice**

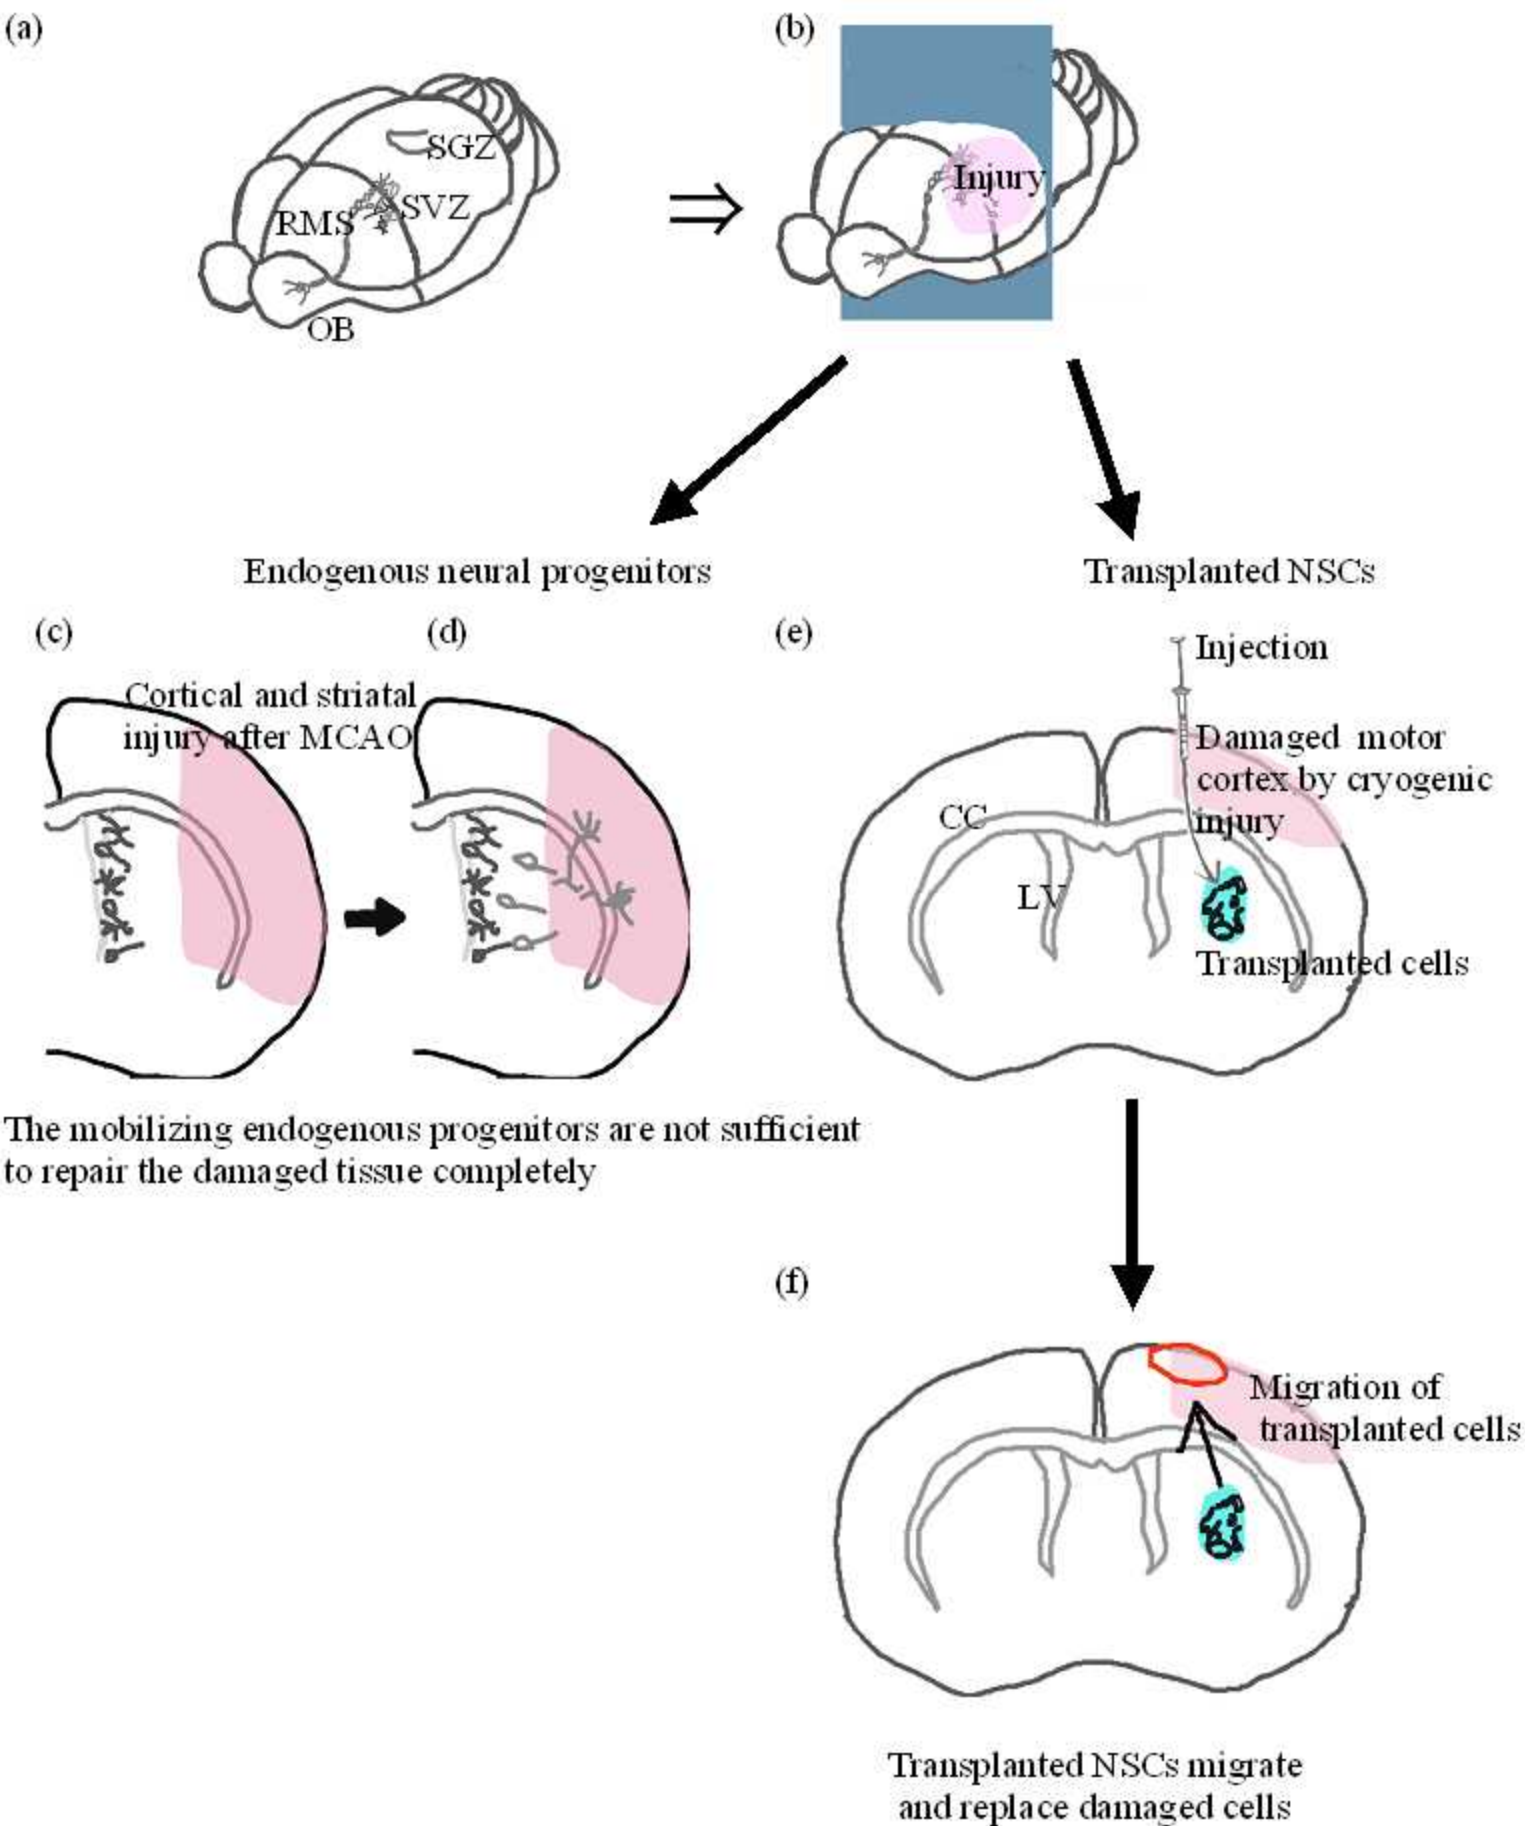

**Figure 2. SDF1 expression by glial fibrillary acidic protein (GFAP) positive cells in the damaged motor cortex in mice**

SDF1

GFAP

Merge

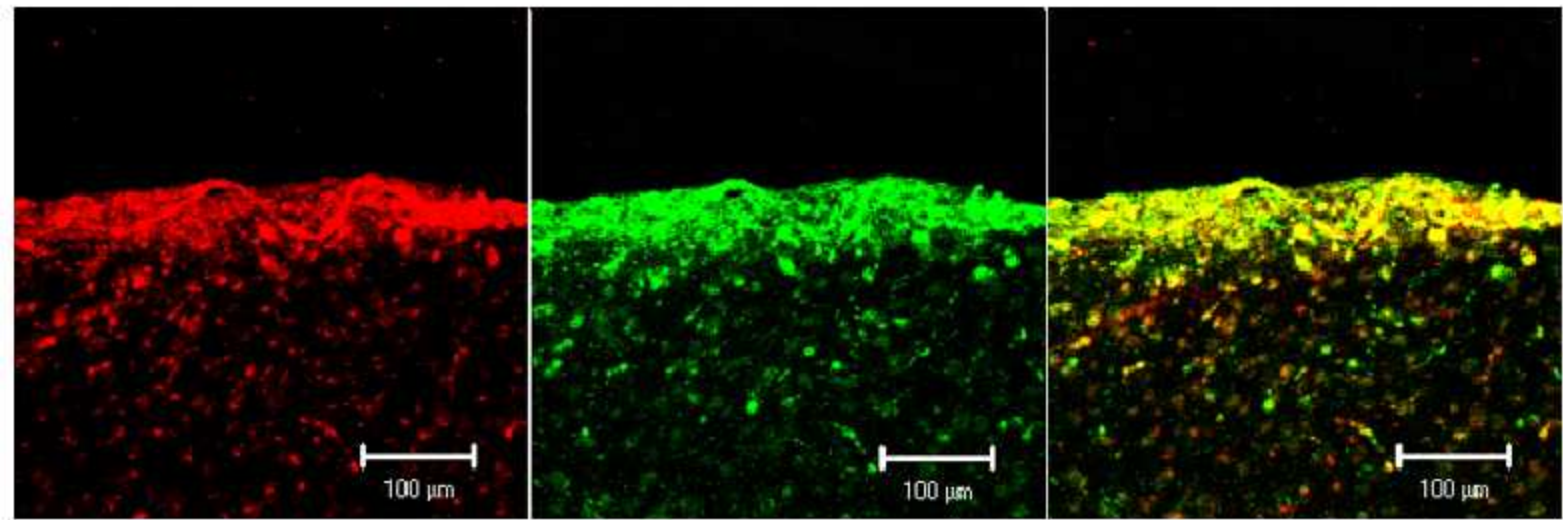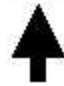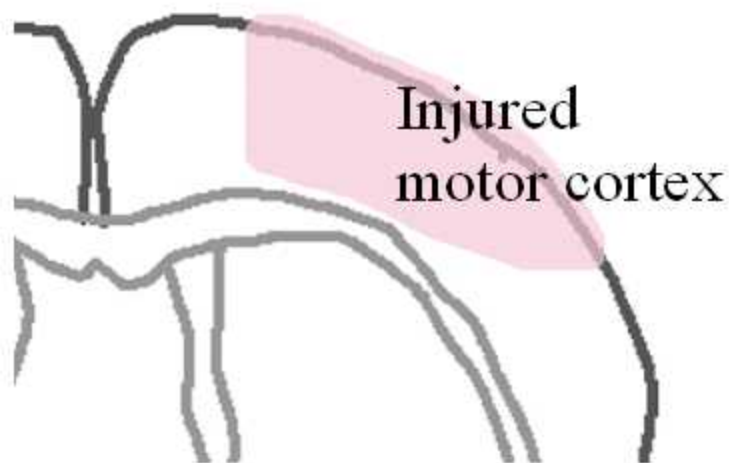

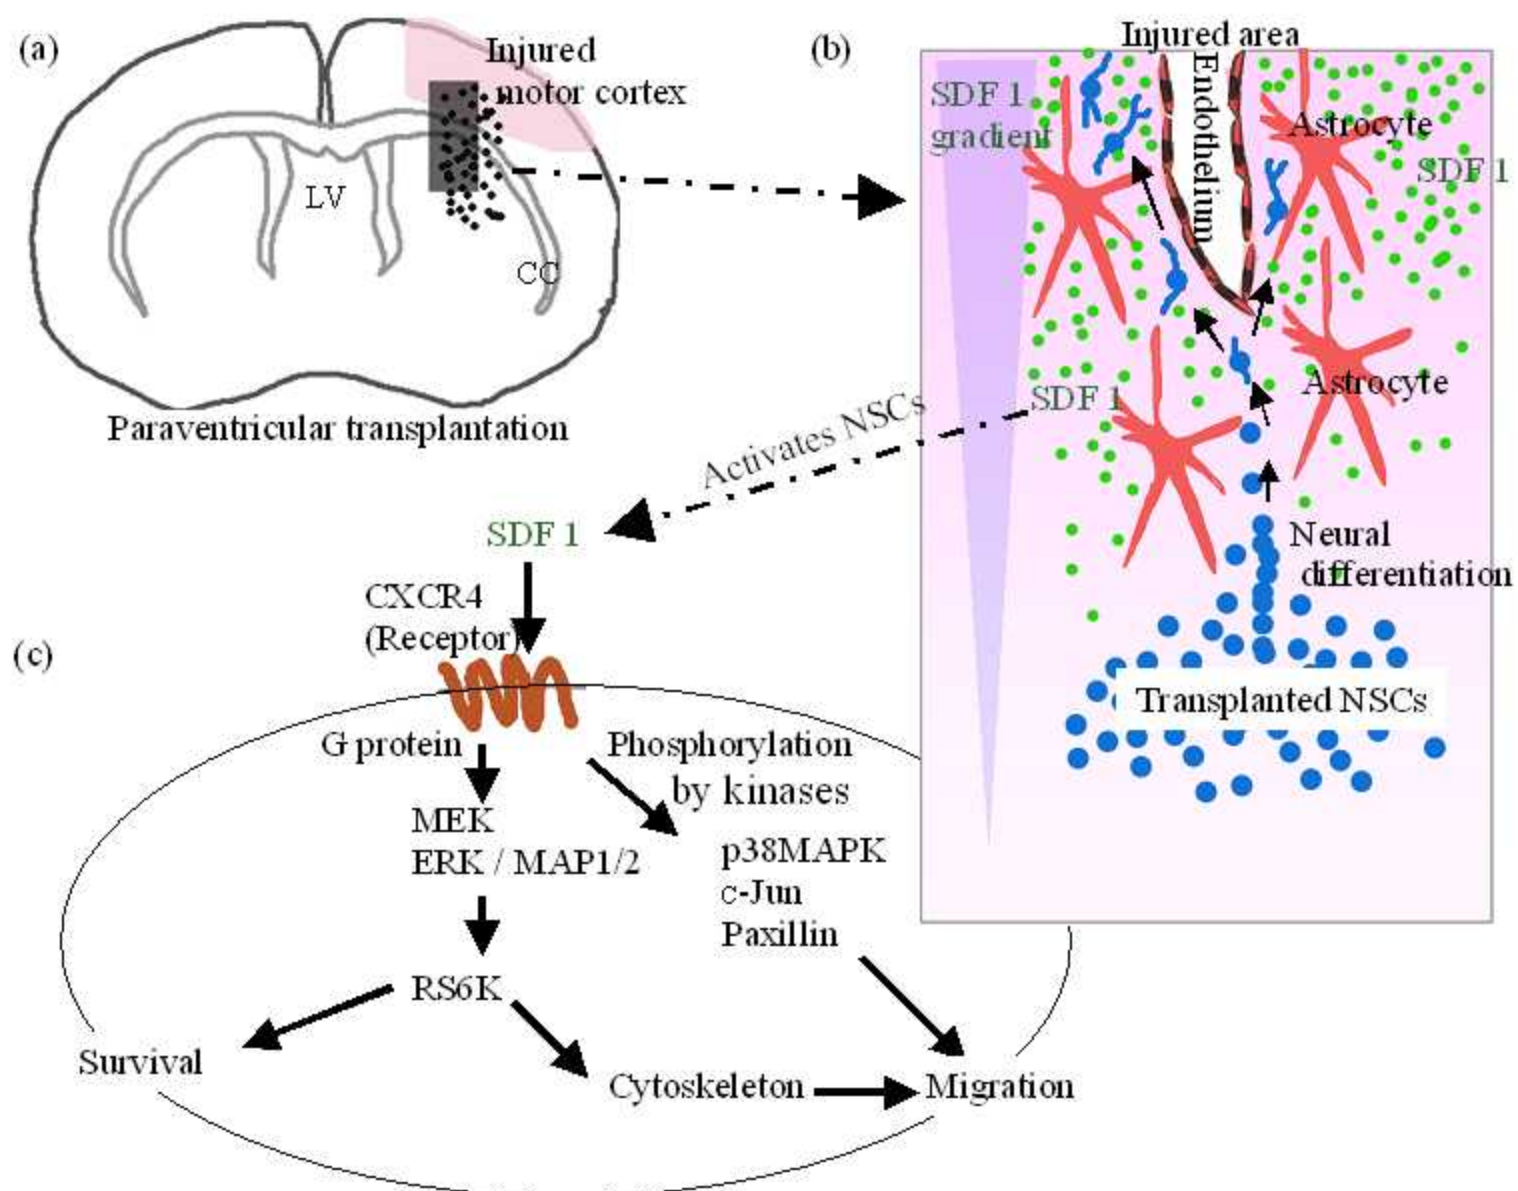

**Figure 3. Involvement of chemokines/chemokine receptors in the neural cell migration after cell transplantation in injured mouse motor cortex**

**Figure 3. Involvement of chemokines/chemokine receptors in the neural cell migration after cell transplantation in injured mouse motor cortex**

(d) Radial migration

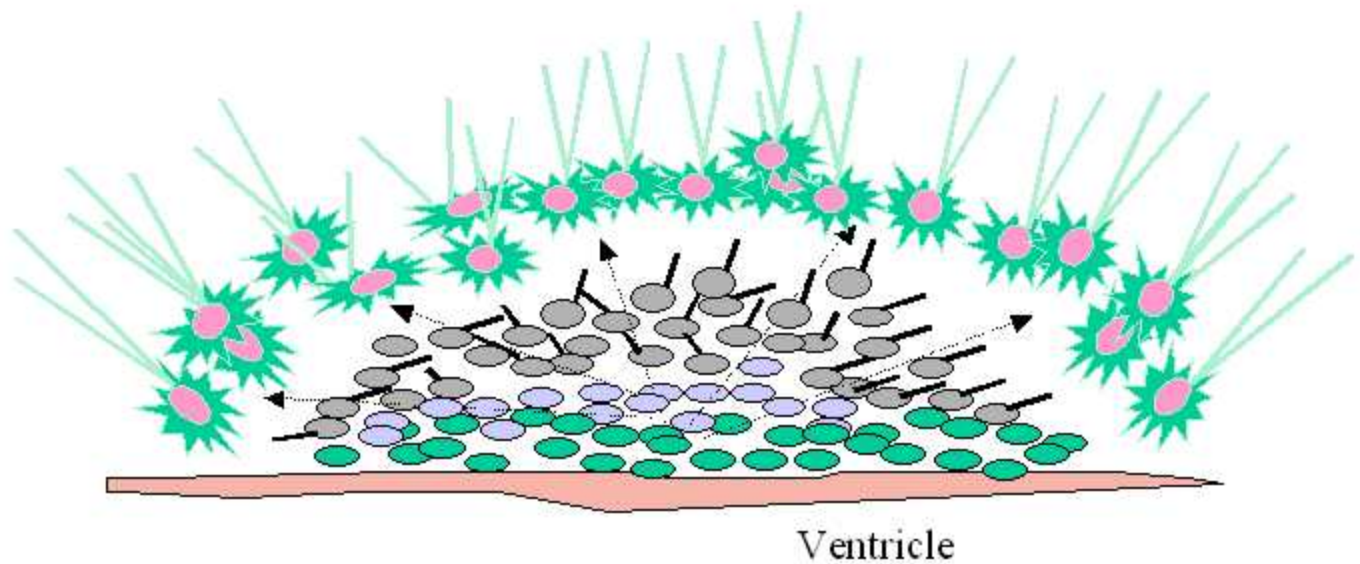

(e) Tangential migration

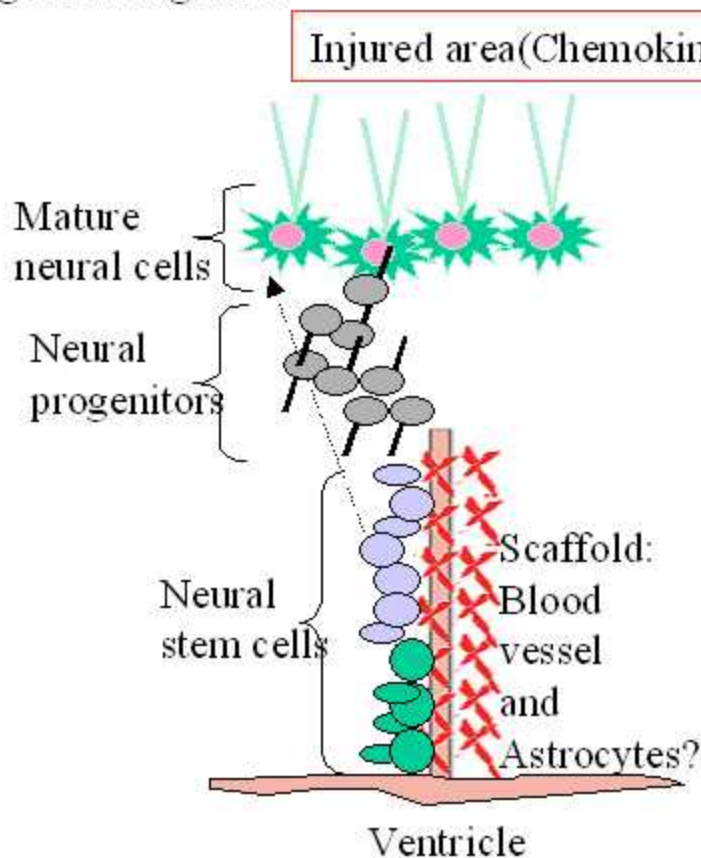

Supplement: Supplementary file 1 [file ijms-13-02636-s001.pdf]
